# Supplementary material
Source: Springer Nature journal article supplement (https://www.springermedizin.de/resource/supplementary/12955_2005_198_MOESM1_ESM.pdf/9559880)
Supplement: MOESM1 [file 9559880]

**Menopause-Related Vasomotor Symptoms**

- Sleep disturbances
- Mood swings
- Cognitive deficits
- Reduced quality of life
  - Work-related disability
  - Social isolation
  - Embarrassment

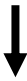

**Increased Economic Burden**

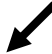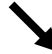

**Physician visits**

**Loss of productivity at home and work**

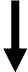

**Prescription and OTC medication**

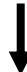

**Increased energy usage for air conditioning and laundry**

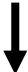

**Laboratory fees**

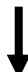

**Hygiene-related personal costs**

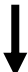

**Follow-up visits/phone calls for medication side effects**

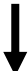

**Visits to medical specialists and alternative medicine practitioners**
